# Supplementary material for: Melatonin Engineering M2 Macrophage‐Derived Exosomes Mediate Endoplasmic Reticulum Stress and Immune Reprogramming for Periodontitis Therapy
Source: PubMed Central journal article supplement (PMC10520618; doi:10.1002/advs.202302029), 2023-07-14
Supplement: ADVS-10-2302029-s001.pdf [file ADVS-10-2302029-s001.pdf]

## Supporting Information

for *Adv. Sci.*, DOI 10.1002/adv.202302029

Melatonin Engineering M2 Macrophage-Derived Exosomes Mediate Endoplasmic Reticulum Stress and Immune Reprogramming for Periodontitis Therapy

*Ya Cui, Shebin Hong, Yunhui Xia, Xiaojing Li, Xiaoya He, Xiangying Hu, Yaxin Li, Xudong Wang\*, Kaili Lin\* and Lixia Mao\**

# Supporting Information

## Melatonin engineering M2 macrophage-derived exosomes mediate endoplasmic reticulum stress and immune reprogramming for periodontitis therapy

Ya Cui<sup>a1</sup>, Shebin Hong<sup>a1</sup>, Yunhui Xia<sup>a1</sup>, Xiaojing Li<sup>a</sup>, Xiaoya He<sup>a</sup>, Xiangying Hu<sup>a</sup>, Yaxin Li<sup>a</sup>, Xudong Wang<sup>a\*</sup>, Kaili Lin<sup>a\*</sup>, Lixia Mao<sup>a\*</sup>

<sup>a</sup> Department of Oral & Cranio-Maxillofacial Surgery, Shanghai Ninth People's Hospital, College of Stomatology, Shanghai Jiao Tong University School of Medicine; National Clinical Research Center for Oral Diseases; Shanghai Key Laboratory of Stomatology & Shanghai Research Institute of Stomatology, Shanghai 200011, China

<sup>1</sup> These three authors contributed equally to this work.

\*Corresponding authors :

Lixia Mao

Department of Oral & Cranio-Maxillofacial Surgery, Shanghai Ninth People's Hospital, College of Stomatology, Shanghai Jiao Tong University School of Medicine; National Clinical Research Center for Oral Diseases; Shanghai Key Laboratory of Stomatology & Shanghai Research Institute of Stomatology, Shanghai 200011, China

E-mail: [Maolx1302@126.com](mailto:Maolx1302@126.com)

Kaili Lin

Department of Oral & Cranio-Maxillofacial Surgery, Shanghai Ninth People's Hospital, College of Stomatology, Shanghai Jiao Tong University School of Medicine; National Clinical Research Center for Oral Diseases; Shanghai Key Laboratory of Stomatology & Shanghai Research Institute of Stomatology, Shanghai 200011, China

E-mail: [lklecnu@aliyun.com](mailto:lklecnu@aliyun.com)

Xudong Wang

Department of Oral & Cranio-Maxillofacial Surgery, Shanghai Ninth People's Hospital, College of Stomatology, Shanghai Jiao Tong University School of Medicine; National Clinical Research Center for Oral Diseases; Shanghai Key Laboratory of Stomatology & Shanghai Research Institute of Stomatology, Shanghai 200011, China

E-mail: [wang70@hotmail.com](mailto:wang70@hotmail.com)

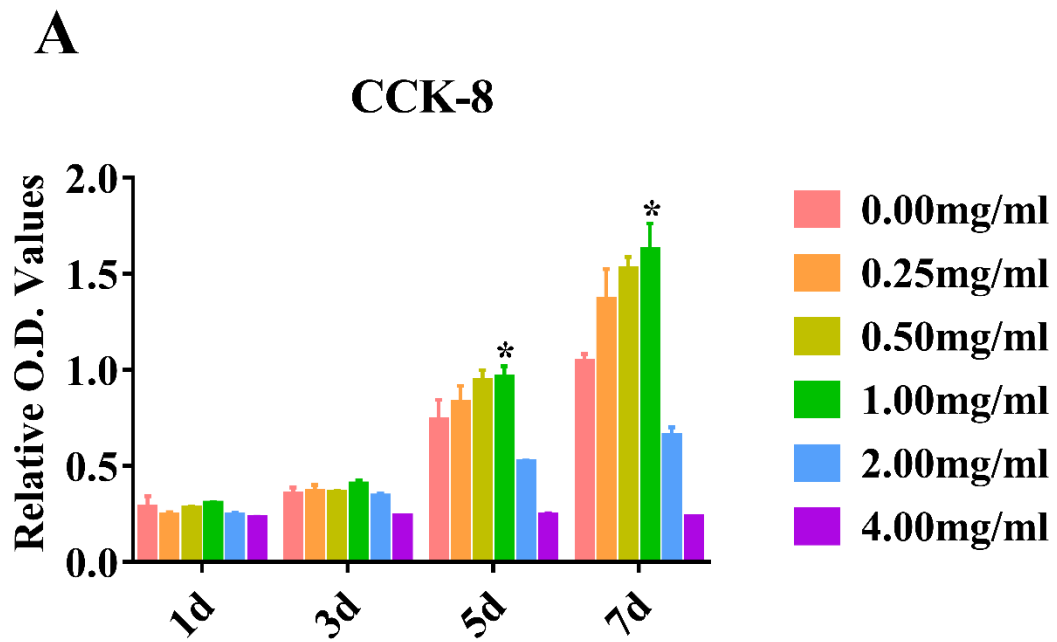

1

2 **Figure S1.** Gating strategies for the concentration screening of melatonin. (A) Gating strategy to  
 3 detect the optimal melatonin concentration loaded in M2-exos for the proliferation of hPDLCs.  
 4 Data represented as mean  $\pm$  SD (n=3). The significance of the data was calculated by the one-way  
 5 ANOVA.

6

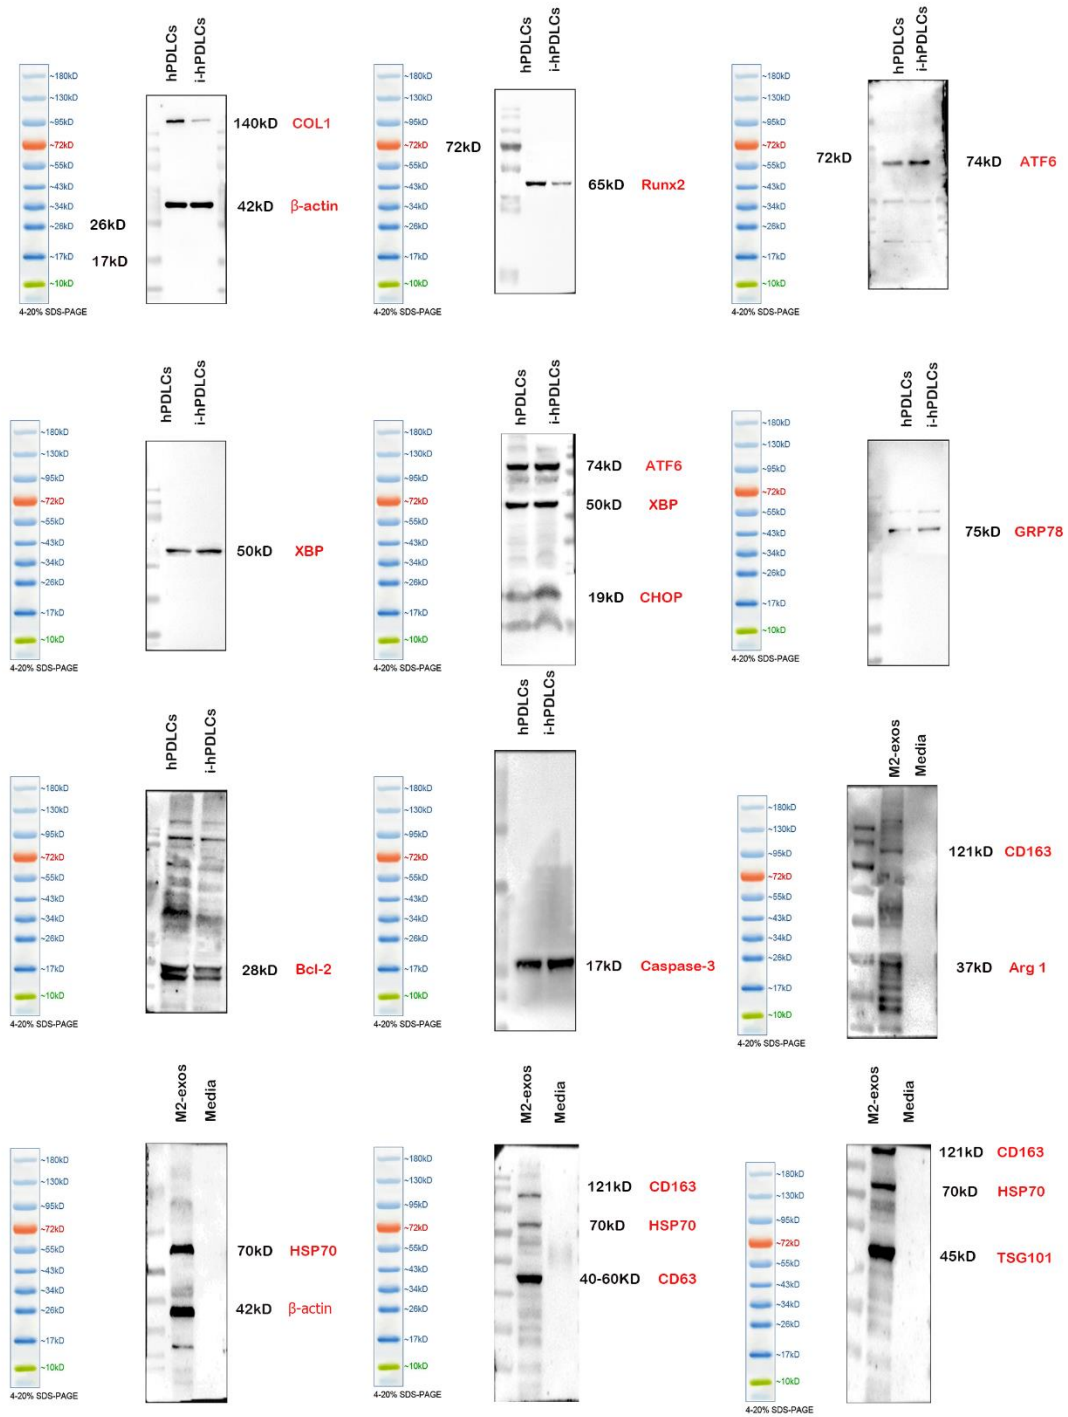

1  
2  
3

**Figure S2.** The raw, unmodified uncropped scanning figures of western blot.

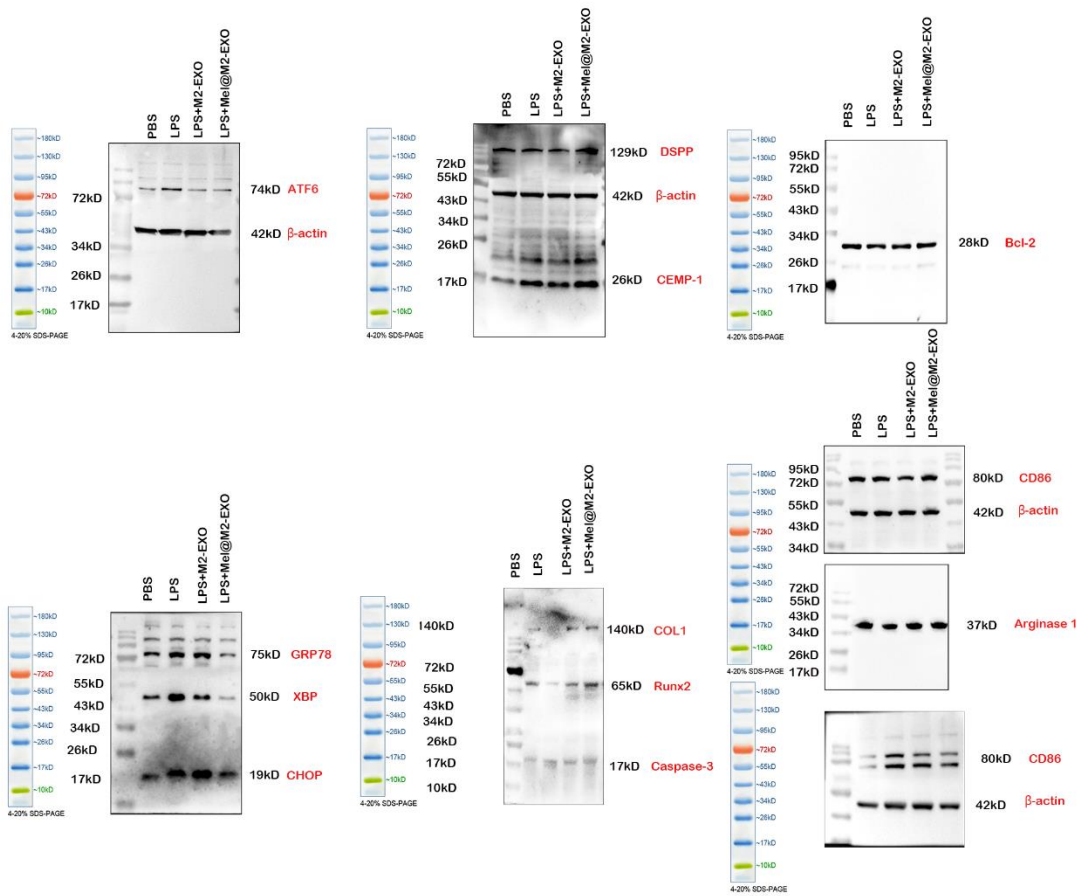

1  
2  
3

**Figure S3.** The raw, unmodified uncropped scanning figures of western blot.

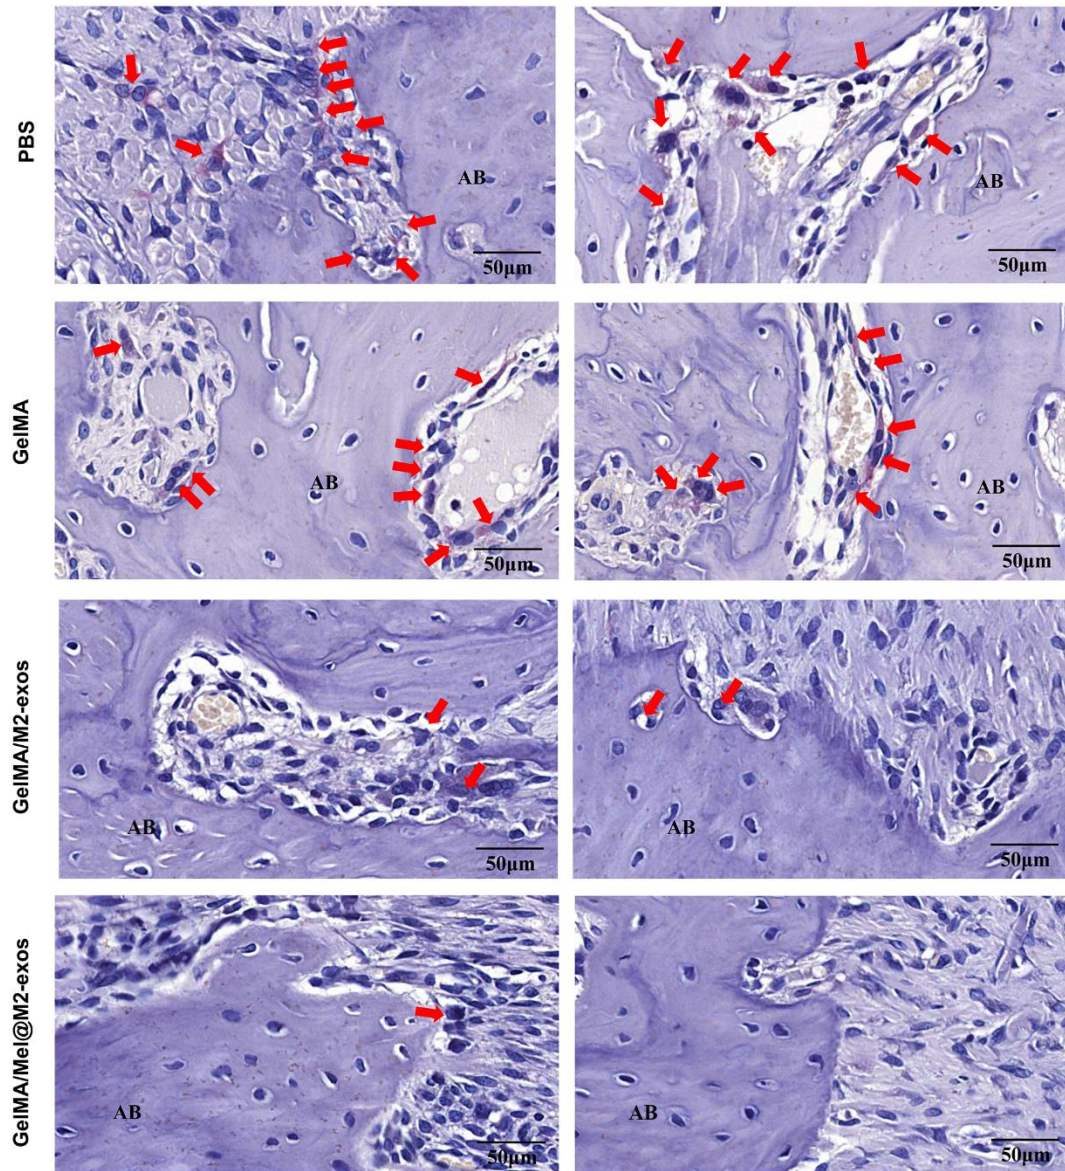

1

2 **Figure S4.** TRAP staining images (arrows indicate osteoclasts that are dyed red) of maxillary  
 3 alveolar bone in rat ligature-induced periodontitis model.

4



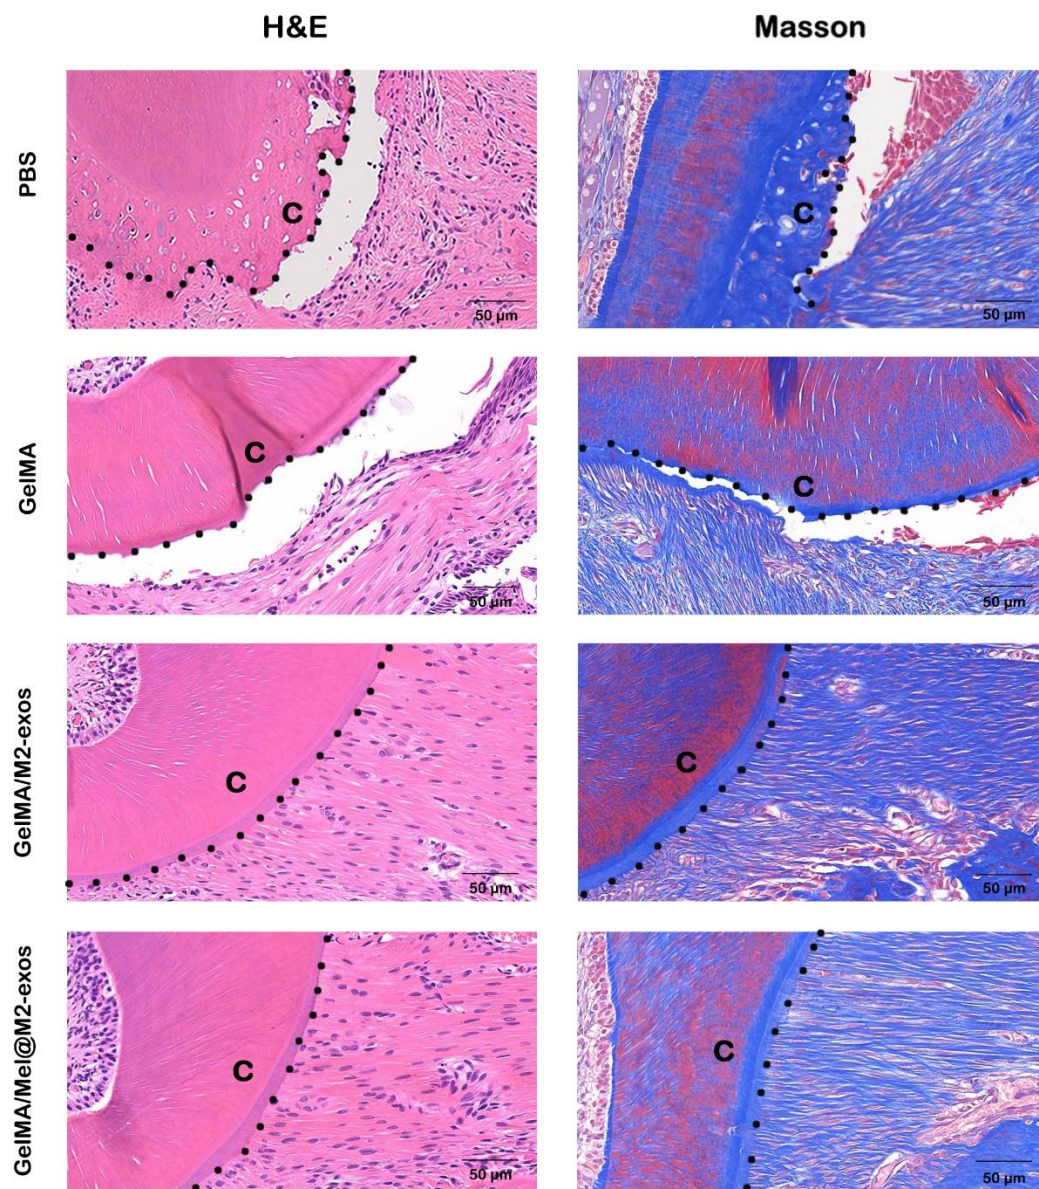

1

2 **Figure S5.** H&E and Masson staining. C = cementum.

3

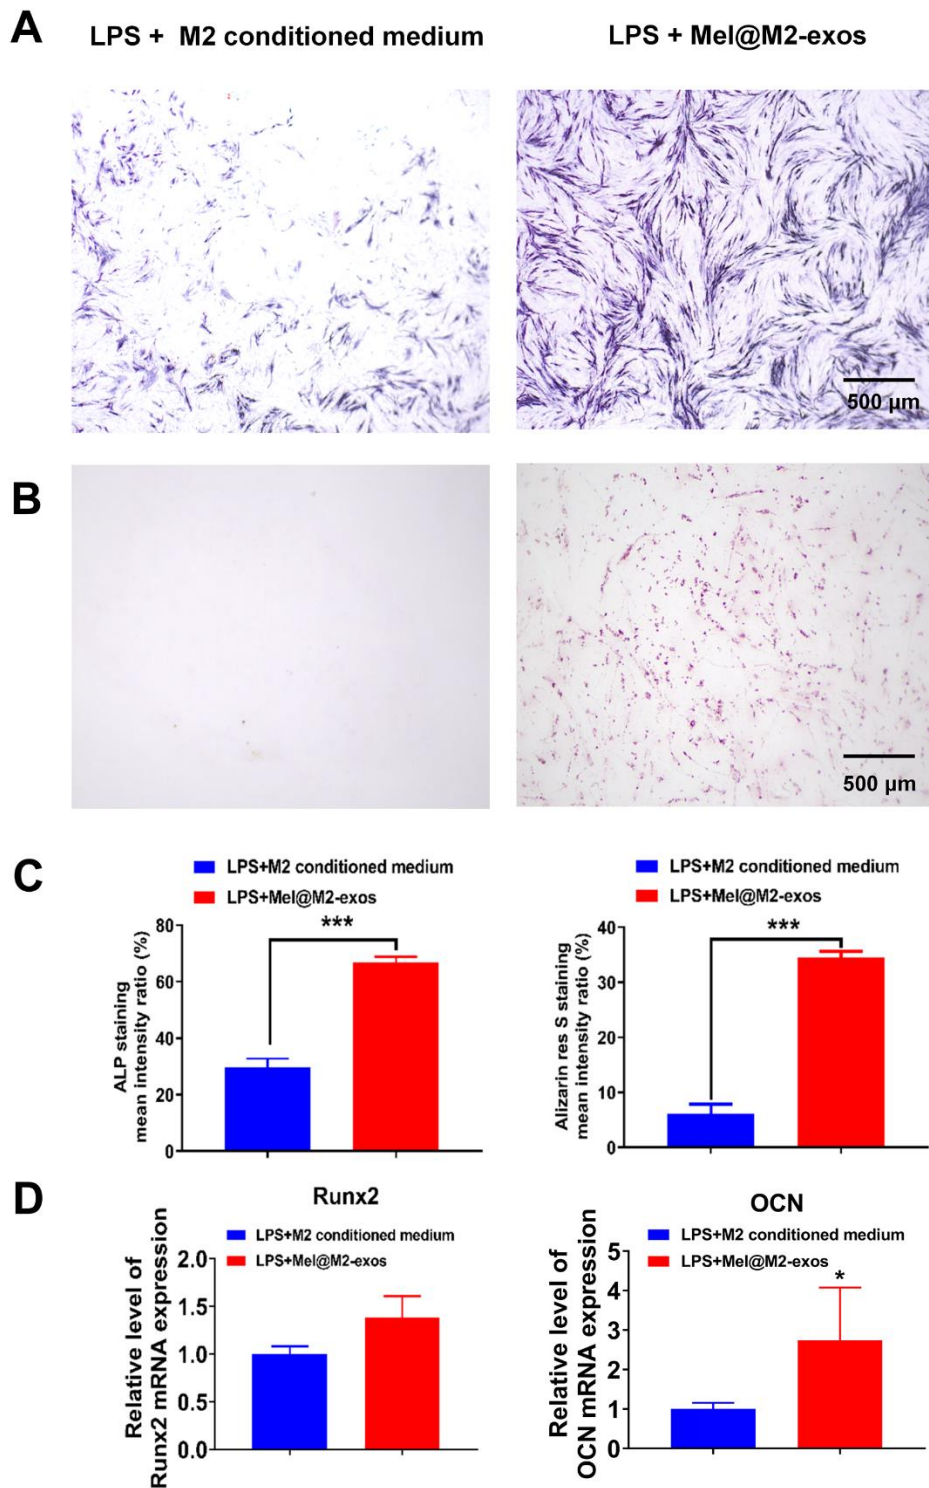

1

2 **Figure S6.** Comparison of the effects of M2 macrophage conditioned medium and Mel@M2-exos  
 3 on osteogenic differentiation of inflammatory hPDLCs. (A) ALP staining of inflammatory  
 4 hPDLCs cultured with M2 conditioned medium and Mel@M2-exos (inverted microscope; scale



1 bar: 500  $\mu\text{m}$ ). (B) ARS and calcium deposition production of inflammatory hPDLs cultured with  
2 M2 conditioned medium and Mel@M2-exos (inverted microscope; scale bar: 500  $\mu\text{m}$ ). (C) The  
3 quantitative analysis of ALP staining, ARS and calcium deposition production in inflammatory  
4 hPDLs cultured with M2 macrophage conditioned medium and Mel@M2-exos. (D) The mRNA  
5 levels of osteogenic genes in inflammatory hPDLs cultured with M2 macrophage conditioned  
6 medium and Mel@M2-exos, including Runx2 and OCN. Data represented as mean  $\pm$  SD (n=3).  
7 The significance of the data was calculated by the one-way ANOVA.

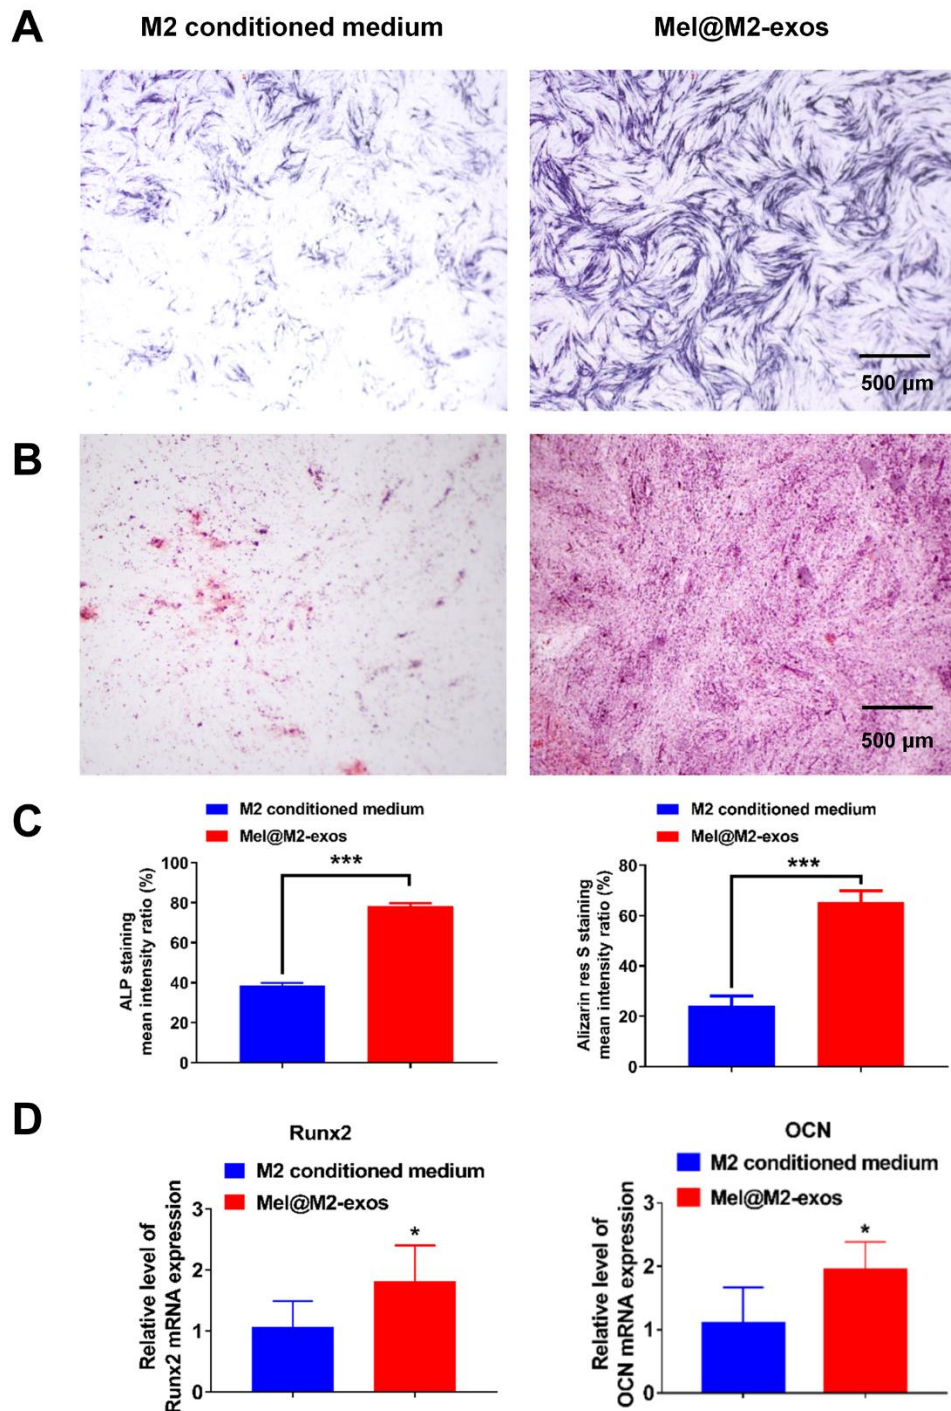

1

2 **Figure S7.** Comparison of the effects of M2 macrophage conditioned medium and Mel@M2-exos  
 3 on osteogenic differentiation of human periodontal ligament cells (hPDLs). (A) ALP staining in  
 4 M2 conditioned medium and Mel@M2-exos (inverted microscope; scale bar: 500  $\mu$ m). (B) ARS  
 5 and calcium deposition production in M2 conditioned medium and Mel@M2-exos (inverted  
 6 microscope; scale bar: 500  $\mu$ m). (C) The quantitative analysis of ALP staining, ARS and calcium

1 deposition production in hPDLs cultured with M2 macrophage conditioned medium and  
 2 Mel@M2-exos. (D) The mRNA levels of osteogenic genes, including Runx2 and OCN. Data  
 3 represented as mean  $\pm$  SD (n=3). The significance of the data was calculated by the one-way  
 4 ANOVA.

5  
 6

7 **Table S1. Primers used in this study**

| Gene         | Forward and reverse sequences (5'-3') |
|--------------|---------------------------------------|
| GAPDH-F (H)  | CGCTCTCTGCTCCTCCTGTT                  |
| GAPDH-R (H)  | CCATGGTGTCTGAGCGATGT                  |
| ALP-F (H)    | GACCCTTGACCCCAACAAT                   |
| ALP-R (H)    | GCTCGTACTGCATGTCCCCT                  |
| COL1-F (H)   | AGAACAGCGTGGCCT                       |
| COL1-R (H)   | TCCGGTGTGACTCGT                       |
| OCN-F (H)    | GGCAGCGAGGTAGTGAAGAG                  |
| OCN-R (H)    | GATGTGGTCAGCCAACTCGT                  |
| RUNX-2-F (H) | GGAGTGGACGAGGCAAGAGTTT                |
| RUNX-2-R (H) | AGCTTCTGTCTGTGCCTTCTGG                |
| CAP-F (H)    | CTGCGCGCTGCACATGG                     |
| CAP-R (H)    | GCGATGTCGTAGAAGGTGAGCC                |
| CEMP1-F (H)  | GGGCACATCAAGCACTGACAG                 |
| CEMP1-R (H)  | CCCTTAGGAAGTGGCTGTCCAG                |
| DSPP-F(H)    | TTTGGGCAGTAGCATGGC                    |
| DSPP-R(H)    | CCATCTTGGGTATTCTCTTGCCCT              |
| DMP1-F(H)    | CTCCGAGTTGGACGATGAGG                  |
| DMP1-R(H)    | TCATGCCTGCACTGTTTCATTC                |
| RANKL-F (H)  | GGCTCATGGTTAGATCTGGC                  |
| RANKL-R (H)  | TGACCAATACTGGTGCTTCC                  |
| OPG-F (H)    | TCAAGCAGGAGTGCAATCG                   |
| OPG-R (H)    | AGAATGCCTCCTCACACAGG                  |
| GRP78-F (H)  | TCAAGTTCTTGCCGTTCAAGG                 |
| GRP78-R (H)  | AAATAAGCCTCAGCGTTTCTT                 |
| CHOP-F (H)   | CAAGAGTCTGTCTTCAGATGA                 |
| CHOP-R (H)   | TCTGTTTCCGTTTCTGGTTC                  |
| ATF6-F (H)   | TGCTTTACATTCCTCCAC                    |
| ATF6-R (H)   | TGACTTGGTCTTTTACTT                    |
| XBP1-F (H)   | CCTGGTTGCTGAAGAGGAGG                  |
| XBP1-R (H)   | CCATGGGGAGATGTTCTGGAG                 |
| PERK-F (H)   | GTGATAAAGGTTTCGGTTGCTG                |
| PERK -R (H)  | TGTTTTCTGTGGCTCCTCTGG                 |

---

|                      |                             |
|----------------------|-----------------------------|
| IRE1-F (H)           | CCTAGTCAGTTCTGCGTCCG        |
| IRE1-R (H)           | TTCCATCCAGCGTTGACACA        |
| IL-1-F (H)           | TGGCTTATTACAGTGGCAATGAGGATG |
| IL-1-R (H)           | TGTAGTGGTGGTCGGAGATTCGTAG   |
| IL-6-F (H)           | GGTGTTCCTGCTGCCTTCC         |
| IL-6-R (H)           | GTTCTGAAGAGGTGAGTGGCTGTC    |
| TNF- $\alpha$ -F (H) | CGTGGAGCTGGCCGAGGAG         |
| TNF- $\alpha$ -R (H) | AGGAAGGAGAAGAGGCTGAGGAAC    |
| COX-2-F (H)          | TGAGCATCTACGGTTTGCTG        |
| COX-2-R (H)          | AACTGCTCATCACCCCATTC        |
| CCL-2-F (H)          | AGAATCACCAGCAGCAAGTGTCC     |
| CCL-2-R (H)          | TCCTGAACCCACTTCTGCTTGG      |
| GAPDH-F (M)          | AGGTCGGTGTGAACGGATTG        |
| GAPDH-R (M)          | TGTAGACCATGTAGTTGAGGTCA     |
| iNOS-F (M)           | GTTCACAGCCCAACAATACAAGA     |
| iNOS-R (M)           | GTGGACGGGTCGATGTCAC         |
| CD86-F (M)           | TGTTCCGTGGAGACGCAAG         |
| CD86-R (M)           | TTGAGCCTTTGTAAATGGGCA       |
| CD206-F (M)          | CTCTGTTTCAGCTATTGGACGC      |
| CD206-R (M)          | CGGAATTTCTGGGATTCAGCTTC     |
| Arginase 1-F (M)     | CTCCAAGCCAAAGTCCTTAGAG      |
| Arginase 1-R (M)     | AGGAGCTGTCATTAGGGACATC      |

---

- 1
- 2
- 3
- 4
- 5
- 6
- 7
- 8
- 9
- 10
- 11



1 **Table S2. Antibodies used in this study**

| MARKER (SPECIES)               | DILUTION | DISTRIBUTOR/SOURCE |
|--------------------------------|----------|--------------------|
| Primary antibodies:            |          |                    |
| CD63 Rabbit mAb                | 1:1000   | Abcam, London, UK  |
| HSP70 Rabbit mAb               | 1:1000   | Abcam, London, UK  |
| Anti-TSG101 Rabbit mAb         | 1:1000   | Abcam, London, UK  |
| $\beta$ -actin Mouse mAb (4F2) | 1:1000   | Abcam, London, UK  |
| CD163 Rabbit mAb               | 1:1000   | Abcam, London, UK  |

2

3

---

|                                         |        |                                    |
|-----------------------------------------|--------|------------------------------------|
| Arginase 1 Rabbit mAb                   | 1:1000 | Cell Signaling, Massachusetts, USA |
| iNOS Rabbit mAb                         | 1:1000 | Cell Signaling, Massachusetts, USA |
| RUNX2 Rabbit mAb                        | 1:1000 | Cell Signaling, Massachusetts, USA |
| COL1A1 Rabbit mAb                       | 1:1000 | Abcam, London, UK                  |
| GRP78 BiP Rabbit mAb                    | 1:1000 | Abcam, London, UK                  |
| ATF6 Rabbit mAb                         | 1:1000 | Invitrogen, CA, USA                |
| XBP Rabbit mAb                          | 1:1000 | Cell Signaling, Massachusetts, USA |
| CHOP Rabbit mAb                         | 1:1000 | Cell Signaling, Massachusetts, USA |
| Caspase-3 Rabbit mAb                    | 1:1000 | Cell Signaling, Massachusetts, USA |
| Bcl-2 Rabbit mAb                        | 1:1000 | Cell Signaling, Massachusetts, USA |
| CEMP-1 Rabbit mAb                       | 1:1000 | Abcam, London, UK                  |
| DSPP Rabbit mAb                         | 1:1000 | Abmart, Shanghai, China            |
| Secondary antibodies:                   |        |                                    |
| Anti-mouse IgG HRP-linked Ab            | 1:1000 | Abcam, London, UK                  |
| Anti-rabbit IgG HRP-linked Ab           | 1:1000 | Abcam, London, UK                  |
| Anti-rabbit IgG (Alexa Fluor™ Plus 647) | 1:500  | Invitrogen, CA, USA                |

---

1

2

3
